# Supplementary material for: Psychological Distress and Food Insecurity among International Students at a Hungarian University: A Post-Pandemic Survey
Source: MDPI journal article supplement (doi:10.3390/nu16020241), 2024-01-12
Supplement: s1 [file s1]

**Supplementary Table S1.** Factors associated with psychological distress among the participants according to the bivariate analysis.

| Variables                  | Depression  |              | X     | p     | Anxiety     |              | X     | p     | Stress      |              | X      | p     |
|----------------------------|-------------|--------------|-------|-------|-------------|--------------|-------|-------|-------------|--------------|--------|-------|
|                            | No<br>n (%) | Yes<br>n (%) |       |       | No<br>n (%) | Yes<br>n (%) |       |       | No<br>n (%) | Yes<br>n (%) |        |       |
| <b>Age (years)</b>         |             |              | 6.481 | 0.039 |             |              | 1.174 | 0.556 |             |              | 4.115  | 0.128 |
| 18-24                      | 141 (61.3)  | 10 (64.3)    |       |       | 133 (64.9)  | 116 (60.1)   |       |       | 177 (63.0)  | 72 (61.5)    |        |       |
| 25-29                      | 54 (23.5)   | 48 (28.6)    |       |       | 48 (23.4)   | 54 (29.0)    |       |       | 66 (23.4)   | 36 (30.8)    |        |       |
| >=30                       | 35 (15.2)   | 12 (7.1)     |       |       | 24 (11.7)   | 23 (12.0)    |       |       | 38 (13.5)   | 9 (7.7)      |        |       |
| <b>Gender</b>              |             |              | 1.331 | 0.249 |             |              | 7.079 | 0.008 |             |              |        |       |
| Male                       | 112 (60.9)  | 72 (39.1)    |       |       | 108 (58.7)  | 76 (41.3)    |       |       | 143 (77.8)  | 41 (22.2)    | 8.345  | 0.004 |
| Female                     | 118 (55.1)  | 96 (44.9)    |       |       | 97 (45.3)   | 117 (54.7)   |       |       | 138 (64.4)  | 76 (35.6)    |        |       |
| <b>Region</b>              |             |              | 3.593 | 0.309 |             |              | 1.217 | 0.749 |             |              | 5.094  | 0.165 |
| Asia                       | 154 (61.1)  | 98 (38.9)    |       |       | 132 (52.4)  | 120 (47.6)   |       |       | 185 (73.4)  | 67 (26.6)    |        |       |
| Africa                     | 54 (52.9)   | 48 (47.1)    |       |       | 52 (51.0)   | 50 (49.0)    |       |       | 71 (69.6)   | 31 (30.4)    |        |       |
| Europe                     | 11 (45.8)   | 13 (54.2)    |       |       | 13 (54.2)   | 11 (45.8)    |       |       | 14 (58.3)   | 10 (41.7)    |        |       |
| Americas                   | 11 (55.0)   | 9 (45.0)     |       |       | 8 (40.0)    | 12 (60.0)    |       |       | 11 (55.0)   | 9 (45.0)     |        |       |
| <b>Religious</b>           |             |              | 0.047 | 0.828 |             |              | 2.316 | 0.128 |             |              | <0.001 | 0.997 |
| No                         | 50 (58.8)   | 35 (41.2)    |       |       | 50 (58.8)   | 35 (41.2)    |       |       | 60 (70.6)   | 25 (29.4)    |        |       |
| Yes                        | 180 (57.5)  | 133 (42.5)   |       |       | 155 (49.5)  | 158 (50.5)   |       |       | 221 (70.6)  | 92 (29.4)    |        |       |
| <b>Relationship status</b> |             |              | 5.354 | 0.021 |             |              | 0.677 | 0.411 |             |              |        |       |
| Single                     | 152 (54.1)  | 129 (45.9)   |       |       | 141 (50.2)  | 140 (49.8)   |       |       | 189 (67.3)  | 92 (32.7)    | 5.148  | 0.023 |
| Partnered                  | 78 (66.7)   | 39 (33.3)    |       |       | 64 (54.7)   | 53 (45.3)    |       |       | 92 (78.6)   | 25 (21.4)    |        |       |
| <b>Living arrangements</b> |             |              | 3.521 | 0.061 |             |              | 6.816 | 0.009 |             |              | 8.988  | 0.003 |
| Alone                      | 98 (63.6)   | 56 (36.4)    |       |       | 92 (59.7)   | 62 (40.3)    |       |       | 122 (79.2)  | 32 (20.8)    |        |       |
| Roommate (s)               | 82 (48.8)   | 78 (51.2)    |       |       | 72 (45.0)   | 88 (55.0)    |       |       | 98 (61.2)   | 62 (38.8)    |        |       |
| Family                     | 50 (59.5)   | 34 (40.5)    |       |       | 41 (48.8)   | 43 (51.2)    |       |       | 61 (72.6)   | 23 (27.4)    |        |       |
| <b>Level of education</b>  |             |              | 1.456 | 0.228 |             |              | 0.666 | 0.414 |             |              | 2.898  | 0.089 |
| Undergraduate              | 174 (59.6)  | 118 (40.4)   |       |       | 154 (52.7)  | 138 (47.3)   |       |       | 213 (72.9)  | 79 (27.1)    |        |       |
| Postgraduate               | 56 (52.8)   | 50 (47.2)    |       |       | 51 (48.1)   | 55 (51.9)    |       |       | 68 (64.2)   | 38 (35.8)    |        |       |
| <b>Field of study</b>      |             |              | 2.323 | 0.127 |             |              | 0.758 | 0.384 |             |              | 3.083  | 0.079 |
| Healthcare                 | 154 (60.6)  | 100 (39.4)   |       |       | 135 (53.1)  | 119 (46.9)   |       |       | 187 (73.6)  | 67 (26.4)    |        |       |

|                             |            |            |        |        |            |            |        |        |            |            |        |        |
|-----------------------------|------------|------------|--------|--------|------------|------------|--------|--------|------------|------------|--------|--------|
| Other                       | 76 (52.8)  | 68 (47.2)  |        |        | 70 (48.6)  | 74 (51.4)  |        |        | 94 (65.3)  | 50 (34.7)  |        |        |
| <b>Mode of financing</b>    |            |            | 1.030  | 0.310  |            |            | 0.839  | 0.360  |            |            | 0.241  | 0.623  |
| Scholarship                 | 91 (54.8)  | 75 (45.2)  |        |        | 81 (48.8)  | 85 (51.2)  |        |        | 115 (69.3) | 51 (30.7)  |        |        |
| Self-financing              | 139 (59.9) | 93 (40.1)  |        |        | 124 (53.4) | 108 (46.6) |        |        | 166 (71.6) | 66 (28.4)  |        |        |
| <b>Employment</b>           |            |            | 0.335  | 0.563  |            |            | 0.141  | 0.707  |            |            | 0.384  | 0.536  |
| No                          | 201 (57.3) | 150 (42.7) |        |        | 182 (51.9) | 169 (48.1) |        |        | 246 (70.1) | 105 (29.9) |        |        |
| Yes                         | 29 (61.7)  | 18 (38.3)  |        |        | 23 (48.9)  | 24 (51.1)  |        |        | 35 (74.5)  | 12 (25.5)  |        |        |
| <b>Length of stay</b>       |            |            | 8.285  | 0.016  |            |            | 0.581  | 0.748  |            |            | 6.257  | 0.044  |
| < 1                         | 47 (48.0)  | 51 (52.0)  |        |        | 49 (50.0)  | 49 (50.0)  |        |        | 60 (61.2)  | 38 (38.8)  |        |        |
| 1-4                         | 80 (67.2)  | 39 (32.8)  |        |        | 59 (49.6)  | 60 (50.4)  |        |        | 91 (76.5)  | 28 (23.5)  |        |        |
| ≥5                          | 103 (56.9) | 78 (43.1)  |        |        | 97 (53.6)  | 84 (46.4)  |        |        | 130 (71.8) | 51 (28.2)  |        |        |
| <b>Language proficiency</b> |            |            | 4.877  | 0.087  |            |            | 3.718  | 0.156  |            |            | 10.195 | 0.006  |
| Poor                        | 166 (54.8) | 137 (45.2) |        |        | 151 (49.8) | 152 (50.2) |        |        | 203 (67.0) | 100 (33.0) |        |        |
| Medium                      | 49 (66.2)  | 25 (33.8)  |        |        | 39 (52.7)  | 35 (47.3)  |        |        | 58 (78.4)  | 16 (21.6)  |        |        |
| Good                        | 15 (71.4)  | 6 (28.6)   |        |        | 15 (71.4)  | 6 (28.6)   |        |        | 20 (95.2)  | 1 (4.8)    |        |        |
| <b>Tobacco use</b>          |            |            | 2.449  | 0.118  |            |            | 1.952  | 0.162  |            |            | 2.062  | 0.151  |
| No                          | 203 (59.4) | 139 (40.6) |        |        | 181 (52.9) | 161 (47.1) |        |        | 246 (71.9) | 96 (28.1)  |        |        |
| Yes                         | 27 (48.2)  | 29 (51.8)  |        |        | 24 (42.9)  | 32 (57.1)  |        |        | 35 (62.5)  | 21 (37.5)  |        |        |
| <b>Alcohol consumption</b>  |            |            | 1.434  | 0.231  |            |            | 0.516  | 0.473  |            |            | 0.878  | 0.349  |
| No/occasional consumption   | 199 (59.1) | 138 (40.9) |        |        | 171 (50.7) | 166 (49.3) |        |        | 241 (71.5) | 96 (28.5)  |        |        |
| Regular consumption         | 31 (50.8)  | 30 (49.2)  |        |        | 34 (55.7)  | 27 (44.3)  |        |        | 40 (65.6)  | 21 (34.4)  |        |        |
| <b>Self-rated health</b>    |            |            | 5.345  | 0.021  |            |            | 7.801  | 0.005  |            |            | 16.722 | <0.001 |
| Good                        | 170 (61.6) | 106 (38.4) |        |        | 155 (56.2) | 121 (43.8) |        |        | 212 (76.8) | 64 (23.2)  |        |        |
| Poor                        | 60 (49.2)  | 62 (50.8)  |        |        | 50 (41.0)  | 72 (59.0)  |        |        | 69 (56.6)  | 53 (43.4)  |        |        |
| <b>Food security status</b> |            |            | 14.605 | <0.001 |            |            | 17.435 | <0.001 |            |            | 20.072 | <0.001 |
| Food secure                 | 156 (65.5) | 82 (34.5)  |        |        | 143 (60.1) | 95 (39.9)  |        |        | 188 (79.0) | 50 (21.0)  |        |        |
| Food insecure               | 74 (46.2)  | 86(53.8)   |        |        | 62 (38.7)  | 98 (61.3)  |        |        | 93 (85.1)  | 67 (41.9)  |        |        |
